1 **Feedforward inhibition allows input summation to vary in recurrent**  
2 **cortical networks**

3 **Running title:** Input summation in cortical networks

4 **Author:** Mark H. Histed

5 **Affiliation:** National Institute of Mental Health, National Institutes of Health, 35 Convent Dr.  
6 35/3A-203, Bethesda, MD 20892. [mark.histed@nih.gov](mailto:mark.histed@nih.gov).

7 Designed research, Performed research, Analyzed data, Wrote the paper.

8

9 Pages: 31

10 Figures: 7

11 Tables: 0

12 Multimedia: 0

13 3d models: 0

14 Word counts

15       Abstract: 133

16       Introduction: 616

17       Discussion: 1493

18 Conflicts of Interest: none

19

20 **Acknowledgements**

21 We thank Nicolas Brunel and Alessandro Sanzeni for discussion and comments, Lindsey  
22 Glickfeld, Alex Handler, and Oliver Mithoefer for assistance with neurophysiology, John  
23 Maunsell for support, and Bruno Averbeck, Barry Richmond, Lex Kravitz, and Carson Chow for  
24 comments on the manuscript. This work was funded in part by the Intramural Research  
25 Program of the NIMH and by U01 NS090576 (BRAIN Initiative). The authors declare no  
26 competing financial interests.

## 27 **Abstract**

28 Brain computations depend on how neurons transform inputs to spike outputs. Here, to  
29 understand input-output transformations in cortical networks, we recorded spiking  
30 responses from visual cortex (V1) of awake mice of either sex while pairing sensory stimuli  
31 with optogenetic perturbation of excitatory and parvalbumin-positive inhibitory neurons.  
32 We found V1 neurons' average responses were primarily additive (linear). We used a  
33 recurrent cortical network model to determine if these data, as well as past observations of  
34 nonlinearity, could be described by a common circuit architecture. The model showed  
35 cortical input-output transformations can be changed from linear to sublinear with moderate  
36 (~20%) strengthening of connections between inhibitory neurons, but this change depends  
37 on the presence of feedforward inhibition. Thus, feedforward inhibition, a common feature  
38 of cortical circuitry, enables networks to flexibly change their spiking responses via changes  
39 in recurrent connectivity.

## 40 **Significance statement**

41 Brains are made up of neural networks that process information by receiving input activity and  
42 transforming those inputs into output activity. We use optogenetic manipulations in awake mice  
43 to expose how a transformation in a cortical network depends on internal network activity.  
44 Combining numerical simulations with our observations uncovers that transformation depend  
45 critically on feedforward inhibition – the fact that inputs to the cortex often make strong  
46 connections on both excitatory and inhibitory neurons.

47

## 48 Introduction

49 Neurons in the cerebral cortex receive thousands of synaptic inputs and transform those  
50 inputs into spike outputs. Input-output transformations can be characterized in single cells  
51 (measuring firing rate while injecting current to produce a f-I curve, (Connors et al., 1982;  
52 Destexhe and Paré, 1999; Koike et al., 1970)), but network effects can dramatically alter  
53 input-output transformations *in vivo*. For example, ongoing network activity can create  
54 supralinearities in neurons' input-output functions (Priebe and Ferster, 2008), strong  
55 network connectivity can create entirely linear input-output functions (Brunel, 2000; van  
56 Vreeswijk and Sompolinsky, 1996), and recurrent connections can amplify inhibition to  
57 produce sublinearity (Ahmadian et al., 2013).

58 In this work, we examine input-output transformations *in vivo* by first measuring spiking  
59 responses to combinations of visual and optogenetic input in the mouse visual cortex (V1).  
60 Then, to shed light on the network and circuit mechanisms of input-output transformations,  
61 we use a spiking recurrent network model. The experimental data show that excitatory  
62 neuron stimulation gives a primarily linear (additive) input-output transformation in mouse  
63 V1, which stands in contrast to sublinearity seen in monkey V1 (Nassi et al., 2015). The  
64 model shows that the cortical network can achieve both kinds of transformations with only  
65 moderate changes in local recurrent synaptic strengths. The model makes a further  
66 prediction that feedforward inhibition – input that synapses not just on excitatory but also  
67 on inhibitory neurons – allows the cortex to support both kinds of transformations.

68 Optogenetic stimulation can reveal how networks *in vivo* transform inputs into output.  
69 Studies using sensory stimuli alone are complicated by the fact sensory stimuli are processed  
70 by many brain regions, each of which may provide input to a cortical area under study.  
71 Combinations of sensory stimuli have, however, found that a wide range of transformations  
72 are possible, often finding evidence for normalization, a form of sublinear summation  
73 (Carandini and Heeger, 2012). A few recent studies have used direct optogenetic input to  
74 study input-output transformations, and studies in different species have observed both  
75 normalization (Nassi et al., 2015; Sato et al., 2014) and more linear summation (Huang et  
76 al., 2014), pointing to the need to understand what features of cortical networks can change  
77 input-output transformations.

78 Models and theoretical approaches complement experimental studies of input-output  
79 transformations, because is difficult to control connectivity in an *in vivo* cortical network  
80 experimentally. Rate-based models (Ahmadian et al., 2013; Rubin et al., 2015) have  
81 characterized the range of behaviors cortical networks can support. But not all the effects  
82 seen in rate-based models may occur in biological networks, as spiking neurons have  
83 biophysical properties that can impact input-output transformations, such as refractory  
84 periods and nonlinearities due to spike threshold. Analysis of networks of spiking neurons  
85 is most advanced for models that approximate neuronal inputs as currents and not  
86 conductances (e.g. Brunel, 2000), but input-output relationships can be modified by the  
87 changes in effective synaptic strength and Vm variability (Richardson, 2004, 2007) that  
88 occur in realistic conductance-based neurons. Therefore, we use numerical simulations of  
89 models of conductance-based spiking neurons to determine which connectivity properties  
90 might create the input-output transformations seen in our data and in past data.

91 Below, we first describe the experimental results from excitatory optogenetic perturbations  
92 in mouse visual cortex (Figs. 1-2), showing near-linear responses across a wide range of  
93 firing rates and visual contrast. We then describe results from the model, showing that  
94 feedforward inhibition can produce sublinearity (Fig. 3), and that with feedforward  
95 inhibition, local connectivity can allow networks to be either linear or sublinear (Figs. 4-5).  
96 Finally, we construct a model network (Fig. 6) that fits the observations, and show it is  
97 consistent with data from optogenetic perturbations of inhibitory neurons (Fig. 7). The  
98 observations are together best described by a model with feedforward inhibition.

99

## 100 **Materials and Methods**

### 101 *Neurophysiology*

102 All experimental animal procedures were conducted in accordance with NIH standards and were  
103 approved by the IACUC at Harvard Medical School. Animal breeding and surgery were  
104 performed according to the methods described previously (Glickfeld et al., 2013; Histed and  
105 Maunsell, 2013).

106 Neurophysiological data from Emx1-Cre animals (N=4, of both sexes but sex not recorded) were  
107 collected using the methods used in Glickfeld et al. (2013) for extracellular recordings. Briefly,  
108 animals kept on a monitored water schedule were given small drops of water (~1  $\mu$ L) every 60-  
109 120 s during recording to keep them awake and alert. The visual stimulus, a Gabor patch with  
110 spatial frequency 0.1 cycles/deg and sigma 12.5 deg, were presented for 115 ms (FWHM  
111 intensity) and successive visual stimuli were presented every 1 s. Optogenetic light pulses were  
112 delivered on alternating sets of 10 stimulus presentations (light onset 500 ms before first  
113 stimulus, offset 500ms after end of last stimulus; total light pulse duration 10.2s). A 1 s delay  
114 was added after each set of 10 stimulus presentations. Extracellular probes were 32-site silicon  
115 electrodes (Neuronexus, Inc., probe model A4x8). Recording surfaces were treated with PEDOT  
116 to lower impedance and improve recording quality. On each recording day, electrodes were  
117 introduced through the dura and left stationary for approximately 1 hour before recording to give  
118 more stable recordings. ChR2 was expressed in excitatory neurons (as described in Histed and  
119 Maunsell, 2013) using viral injections into the Emx1-Cre (Gorski et al., 2002), (Stock #5628,  
120 Jackson Laboratory, Bar Harbor, ME USA) line. Virus (0.25-1.0  $\mu$ L) was injected into a cortical  
121 site whose retinotopic location was identified by imaging autofluorescence responses to small  
122 visual stimuli. Light powers used for optogenetic stimulation were 500  $\mu$ W/mm<sup>2</sup> on the first  
123 recording session; in later sessions dural thickening was visible and changes in firing rate were  
124 smaller, so power was increased (maximum 3 mW/mm<sup>2</sup>) to give mean spontaneous rate  
125 increases of approximately ~5 spikes/s in that recording session. Optogenetic light spot diameter  
126 was 400-700 $\mu$ m (FWHM) as measured by imaging the delivered light on the cortical surface.  
127 Spike waveforms were sorted after the experiment using OfflineSorter (Plexon, Inc.). Single  
128 units were identified as waveform clusters that showed clear and stable separation from noise  
129 and other clusters, unimodal width distributions, and inter-spike interval histograms consistent  
130 with cortical neuron absolute and relative refractory periods. Multiunits were clusters that were  
131 distinct from noise but did not meet one or more of those criteria, and thus these multiunits likely  
132 group together a small number of single neuron waveforms.

### 133 *Experimental Design and Statistical Analysis*

134 Spike histograms were smoothed using piecewise splines (LOWESS smoothing). To compute  
135 neurons' visual responses (e.g. Fig. 1D, 2A), we counted spikes over a 175 ms period beginning  
136 25 ms after stimulus onset, with a matched baseline period 175 ms long ending at stimulus onset.  
137 To test for non-linearity, for each cell we found the response count with and without optogenetic  
138 stimulation by taking the stimulus response count and subtracting the baseline count. Neurons  
139 were classified as significantly non-linear if the p-value of a two-sample two-tailed Kolmogorov-  
140 Smirnov test on the counts with and without stimulation was less than 0.01. Comparing the  
141 percent of units significant to 1% (the percentage was much higher) controls for multiple  
142 comparisons. The Emx1 dataset includes data from 100 shank penetrations (~25 recording  
143 sessions with a 4-shank electrode). Because the inter-shank spacing was 200-400  $\mu$ m, our

144 stimuli in fixed retinotopic locations could not activate neurons on all shanks. Therefore, we  
145 included only shanks in which an average visual response > 0.2 spikes/s was measured (38/100  
146 shanks). This gave 417 single and multi-units. We examined only units that showed a visual  
147 stimulus response (N=289; mean stimulus response-mean spontaneous > 0.2) in the absence of  
148 ChR2 stimulation. Because ChR2 expression was highest at the site of viral injection and fell off  
149 with distance, we took advantage of this variation to sort units into three groups based on the  
150 strength of local ChR2 activation (Fig. 1C). We found the average change in spontaneous rate  
151 induced by ChR2 stimulation for all units on a shank and rank-ordered the shanks. Dividing  
152 shanks into three groups based on small, medium, or large ChR2 effects yielded three nearly-  
153 equal sized groups of units receiving small, medium or large ChR2 activation. The group sizes  
154 differ by a few units because we sorted by shank, not by individual unit.

155 To test whether units were non-linear, we subtracted spike count around visual responses  
156 described above, subtracted

### 157 *Conductance-based spiking network model*

158 The cortical model is a recurrent network of conductance-based leaky integrate-and-fire neurons.  
159 Example Python code and a Jupyter notebook (<http://jupyter.org>) are provided at [*url redacted*  
160 *for review; code provided on request*] that run the network simulation with all its inputs,  
161 replicating spike counts shown in Fig. 6C, bottom row. To recover the rest of the simulations in  
162 Fig. 3-7, this code can be run in parallel on a larger cluster.

163 Each model neuron is connected randomly to each other neuron with fixed probability (sparsity).  
164 For example, for a 10% sparsity network, each cell receives input from 10% of the excitatory  
165 cells and thus gets  $0.1 * 8000 = 800$  E inputs. Similarly, at 10% sparsity, each cell receives  
166  $0.1 * 2000 = 200$  I inputs. As seen in the cortex, we chose the inhibitory synaptic strength to be  
167 larger than the excitatory synaptic strength. We varied both synaptic strengths and found that  
168 our conclusions are not affected by changes in E/I synaptic strength ratio. (See also Fig. 5 for  
169 effects of changing together E and I recurrent synaptic weights by an order of magnitude). We  
170 refer to this baseline set of random, sparse connections as the balancing connections. For  
171 convenience, to change local connectivity, we change the strength of a second added set of  
172 connections with the same sparsity while keeping the strength of the balancing connections  
173 constant. For example, when I->I connectivity is varied in the 2% sparsity network (e.g. Fig. 4),  
174 each I cell receives an extra 40 synapses from other I cells, and the y-axis in Fig. 4AB shows the  
175 effects of varying the weight of those 40 synapses from zero to ~20% of the weight of the  
176 standard recurrent I->I synapses.

177 Each simulated neuron's membrane potential evolves according to the following equation:

$$\frac{dV_m}{dt} = -\frac{1}{\tau_m} \left[ g_{leak}(V_m - E_{rest}) + g_{ChR2}(V_m - E_e) \right. \\ \left. + g_e(V_m - E_e) + g_i(V_m - E_i) \right]$$

178

179

180 When the membrane potential  $V_m$  crosses a threshold (-50 mV), a spike is recorded and  $V_m$  is  
181 reset to  $E_{rest}$  (-60 mV) for the absolute refractory period (3 ms).

182 Beyond the recurrent inputs from other neurons in the network (described in the model  
183 architecture above), model neurons can receive two kinds of external inputs: external  
184 feedforward inputs simulating e.g. sensory input from thalamus, and external ChR2 inputs.  
185 Feedforward (sensory) inputs are simulated as Poisson spike trains whose rates are changed by  
186 stepping to a new value, with values chosen to approximate visually-evoked changes seen in the  
187 data. ChR2 input is simulated by linearly ramping  $g_{ChR2}$  to a new value over 2 ms, a timescale  
188 consistent with ChR2  $t_{on}$  (Nikolic et al., 2009), and  $g_{ChR2}$  amplitude is varied to reproduce  
189 experimental changes in firing rate (see below). Synaptic conductances  $g_e$  and  $g_i$  are  
190 incremented instantaneously by a constant excitatory or inhibitory synaptic weight when a spike  
191 is fired by a recurrent or feedforward input. The conductances decay with time constants  $\tau_{ge} =$   
192 5 ms and  $\tau_{gi} = 10$  ms, described by:

$$\frac{dg_e}{dt} = -\frac{g_e}{\tau_{ge}}$$
$$\frac{dg_i}{dt} = -\frac{g_i}{\tau_{gi}}$$

193

194 Other constants are: excitatory reversal  $E_e = 0$  mV, inhibitory reversal  $E_i = -80$  mV, membrane  
195 time constant  $\tau_m = 20$  ms. Post-synaptic potential (PSP) amplitudes can vary with network  
196 activity and synaptic weight because the model neurons are conductance-based. As we varied  
197 sparsity in the network, the excitatory PSP amplitude varied over an approximately tenfold range  
198 (0.3-3.0 mV for sparsity 20% - 2%, if calculated assuming that the mean membrane potential of  
199 network neurons is -65mV.)

200 The sparse recurrent connections yield spontaneous activity in the network in the absence of  
201 external input (van Vreeswijk and Sompolinsky, 1998; Vogels and Abbott, 2005). To equate the  
202 spontaneous firing state of the network across different sparsity and synaptic strength, we adjust  
203 network spontaneous rate. We use an additional external Poisson excitatory input to either  
204 excitatory or inhibitory neurons to respectively raise or lower the spontaneous rate. The rate of  
205 this Poisson input is chosen via stepwise optimization to give a mean spontaneous rate across  
206 excitatory neurons of 5 spk/s. (In the 2% sparsity network, these added excitatory synapses  
207 account for only approximately 2% of the total mean conductance). For many networks, a local  
208 minimum of the parameter can be found repeatably, but for extreme values of sparsity and  
209 synaptic strength, the network is unstable and spontaneous rates are either sensitive to small  
210 perturbations or diverge. In these cases network response is not shown (e.g. gray regions, Fig.  
211 5B-C).

212 Simulations were performed with the Brian package (Brette et al., 2007) on a multi-CPU cluster  
213 (the NIH HPC Biowulf cluster, <http://hpc.nih.gov>, or Orchestra, <http://rc.hms.harvard.edu>) with  
214 an integration time step of 50  $\mu$ s.

## 215 Results

216

### 217 *Experimental measurements in mouse V1 show linear summation*

218 We combined visual and excitatory optogenetic input (Fig. 1A-B) by expressing  
219 channelrhodopsin-2 (ChR2) in V1 excitatory neurons using a transgenic mouse line and a  
220 Cre-dependent virus, and we used blue light pulses several seconds in duration (4-6 sec) to  
221 shift neurons' firing rates to a new baseline. We delivered the same visual stimulus  
222 repeatedly, with and without ChR2 stimulation. We kept animals alert by giving them  
223 drops of fluid approximately once a minute, and we measured neurons' spiking via  
224 extracellular recording with multi-site probes.

225 When we presented the same visual stimulus with and without optogenetic stimulation, we  
226 found that V1 neurons' responses scaled nearly linearly (Fig. 1C) – that is, nearly the same  
227 size response was produced even as the optogenetic stimulus changed the baseline firing  
228 rate. Even for relatively large optogenetic baseline shifts (~10 spk/s, roughly the same  
229 magnitude as the average visual response), the visual response was similar with and without  
230 ChR2 stimulation. This response implies the input-output transformation is linear (also  
231 called additive, e.g. Huang et al., 2014), meaning the sensory response produces a fixed  
232 change in firing rate above the changing baseline rate. (In contrast, if the response was  
233 sublinear, higher baseline rates would produce a smaller sensory response.) We saw nearly  
234 linear responses across a range of intensities of the visual stimulus (contrast range: 8%-90%,  
235 Fig. 1D), and we saw linear responses both in averages across single units (N=50) and  
236 multi-units (N=239). Responses became slightly sublinear in cells with the largest baseline  
237 shifts (Fig. 1E), but responses were on average within a few percent of linear (for maximum  
238 contrast, as in Fig. 1D: average sensory response changed from 10.6 spk/s to 10.2 spk/s, a  
239 4.4% change; for single units -4.8%, for multi-units -4.1%; in contrast the average baseline  
240 rate almost doubled: 5.8 to 10.8 spk/s; change +86%).

241 While average neuronal responses were nearly linear, individual recorded units were often  
242 either supra- or sub-linear (Fig. 2). Units with large and small ChR2 effects are non-linear  
243 (points lie above or below the horizontal line that shows a perfectly linear response, Fig.  
244 2A). And both SU and MU are non-linear (Fig. 2A; example timecourses in Fig 2B). With  
245 the 90% contrast visual stimulus, 34% of single units are significantly non-linear (17/50,  
246  $p < 0.01$ , KS test; Fig. 2A), and 28% of multi-units are significantly non-linear (67/239,  
247  $p < 0.01$ , KS test). Such heterogeneity in responses could arise because each neuron has  
248 slightly different local connectivity. Heterogeneity due to local recurrent connections would  
249 suggest the population average linear response is a network effect, arising from connections  
250 between excitatory and inhibitory neurons that cause them to dynamically respond to each  
251 others' activity (van Vreeswijk and Sompolinsky, 1996). Below, using a spiking network  
252 model, we test how connectivity might lead to these observed responses.

### 253 *Other experimental work finds sublinear summation in macaque visual cortex*

254 In contrast to this average linear scaling in mouse primary visual cortex, recent work in the  
255 monkey primary visual cortex (Nassi et al., 2015) found neural responses that were at times  
256 highly sublinear, and averages across neurons were also sublinear. (Previous work in the  
257 tree shrew and mouse has also found linearity and sublinearity, Huang et al., 2014; Sato et



258 al., 2014). The experimental approach used by Nassi et al. does not seem to differ in  
259 important ways from our approach -- they expressed ChR2 primarily in excitatory neurons  
260 (using a CaMKII-alpha promoter strategy), stimulated an area of the cortex a few hundred  
261 microns in diameter, and they paired ChR2 and visual stimulation. Because the different  
262 results may stem from differences in cortical architecture across species, rather than  
263 differences in experimental methods, we sought to determine whether there were features of  
264 local cortical circuits that could change response scaling from linear to sublinear.

### 265 ***Model network simulations identify circuit properties controlling input summation***

266 Since it is difficult to manipulate neural connectivity *in vivo*, we used numerical simulations  
267 of conductance-based model neurons to understand how network connectivity might change  
268 response scaling. We constructed networks of 10,000 conductance-based leaky integrate-  
269 and-fire neurons, 8,000 excitatory (E) and 2,000 inhibitory (I). We chose realistic  
270 parameters for the model neurons, including sparse connectivity (initially 2%), and chose  
271 moderate synaptic strengths such that a few tens of EPSPs were required to push a neuron  
272 over threshold. (We explore a range of values of sparsity and synaptic strength below.)  
273 These sparse, randomly connected networks produce irregular and asynchronous  
274 spontaneous activity (Fig. 3A) similar to that observed experimentally (Destexhe et al.,  
275 2003; Steriade et al., 2001) and show stable responses to external inputs (Vogels and Abbott,  
276 2005). For all simulations, we set the spontaneous average rate of the network to 5 spk/s.  
277 There are a variety of single-cell properties that could set neurons' spontaneous rate, but we  
278 changed the spontaneous rate by supplying a small, constant amount of excitatory input that  
279 does not vary with network activity or input, to either excitatory or inhibitory neurons (see  
280 Methods).

281 To determine how different sorts of feedforward inputs affect neurons' responses, we  
282 simulated external inputs to E and I cells using two input groups of Poisson spike trains  
283 whose rates could be varied independently. As expected, when we varied the external input  
284 rates, increasing input to E cells (x-axis) monotonically increased the average network  
285 response (Fig. 3B, contour lines; average of all excitatory cells in the network, a measure  
286 similar to that obtained by multi-electrode recordings) and increasing input to I cells (y-axis)  
287 monotonically decreased the average network response. However, we could hold the  
288 average response constant by adjusting the two feedforward inputs. When the average  
289 response was constant (along contour lines in Fig. 3B), we still observed changes in response  
290 scaling, and those changes depended on the amount of I input.

291 To assess response scaling in the model (Fig. 3), we began with a combination of E and I  
292 input that produced a 15 spk/s response (chosen because we measured experimentally an  
293 average response that peaked near 15 spk/s, Fig. 1C,D). Then, we multiplied both input  
294 rates by a single constant and measured the size of the response to the scaled input. We  
295 found that when feedforward I input is small, responses are near-linear (Fig. 3C). This is  
296 not surprising, as previous theoretical work using strong local synaptic coupling in models  
297 with binary (van Vreeswijk and Sompolinsky, 1996) or current-based neurons (Brunel, 2000)  
298 showed that networks can produce linear responses even though individual neurons in  
299 cortical networks are nonlinear (Priebe and Ferster, 2008). However, these models did not  
300 characterize the effects of varying feedforward E and I input separately, and so we varied  
301 feedforward I input in the conductance-based model. Indeed, when feedforward I input was

302 varied, we observed deviations from linearity. Even though the spontaneous spike rate and  
303 the spike rate response to a single stimulus alone were both held constant with and without  
304 feedforward inhibition, increasing stimulus strength showed more sublinear response scaling  
305 when feedforward inhibition was present.

### 306 *Local connectivity changes summation only in the presence of feedforward inhibition*

307 While adding feedforward inhibition induced some sublinearity, we wished to know if more  
308 dramatic nonlinearities were possible. Therefore, we next (Fig. 4) changed local recurrent  
309 connectivity between and amongst E and I populations, and measured how those  
310 connectivity changes affected response scaling. Fig. 4 shows the effects of varying two local  
311 connections (first, strength of synapses from E to I, and second, strength of synapses from I  
312 to I) to illustrate the range of effects we observed. To implement varying connectivity in the  
313 model, we added additional connections between two neuronal populations (e.g. E to I, or I  
314 to I) with the same sparsity as the network. We then varied the strength of those additional  
315 connections and measured effects on response scaling.

316 With only feedforward input to E cells (Fig. 4A,C,E), we found that changing network  
317 connections did not dramatically affect response scaling. Changing the connectivity could  
318 change the gain of the network (the size of the response to a constant input, Fig. 4A,  
319 contour lines), but response scaling was nearly linear (Fig. 4A, plot is yellow throughout;  
320 Fig. 4C-D: black lines lie close to horizontal dotted line). At high firing rates, we  
321 consistently saw moderate increases in sublinearity, which seems likely to be due to effects  
322 of the 3 ms absolute refractory period. (To focus on rates well below the refractory period,  
323 we show rates above 50 spk/s as light gray lines in Fig. 4CD). We also varied all pairwise  
324 combinations of E to I connectivity, as well as feedforward E and I input strength, and  
325 found that without feedforward inhibition, responses never showed substantial nonlinearity.  
326 Thus, the linear scaling we had observed in the model when delivering input to E cells only  
327 was robust to changes in local connectivity. In sum, without feedforward inhibition, scaling  
328 was approximately linear, and local connectivity changes had little effect.

329 Near-linear scaling was consistently seen when feedforward input arrived to E cells, but  
330 when feedforward input arrived to both E and I cells, responses could be either linear or  
331 sublinear. When we increased local I to I connection strength (Fig 4B, y-axis), sublinearity  
332 was observed (Fig. 4D; plot parameters correspond to pink asterisk in Fig. 4B, in blue region  
333 of plot). But increased E to I connection strength (Fig. 4B, x-axis) led to increasingly linear  
334 scaling (Fig. 4E; plot parameters correspond to pink ‘|’ symbol in Fig. 4B). The sublinear  
335 scaling produced by stronger I to I connectivity was dramatic. As with all the timecourse  
336 plots (Fig. 4C-F), we chose input strength so the first firing rate response was 15 spk/s, but  
337 when I to I connectivity was increased, subsequent firing rate responses fell as low as 1  
338 spk/s (Fig. 4D). The mechanism by which increased I to I coupling produces increased  
339 sublinearity is not yet understood. Such unintuitive changes might possibly arise from  
340 network-level effects, similar to the way E-I tracking may cause inhibitory neurons to  
341 actually decrease their activity when inhibitory neurons are excited by stimulation  
342 (Ahmadian et al., 2013), or might arise from cell-autonomous changes in conductance that  
343 leads to shunting in individual cells (Chance et al., 2002; Richardson, 2004). Further  
344 theoretical work will be required to understand why increased I-I coupling leads to  
345 increased sublinearity in spiking networks. However, it is likely that I-I connectivity

346 changes can be achieved in cortical inhibitory neurons, as inhibitory cells modify their  
347 dendritic structure over time (Chen et al., 2011). In sum, the numerical simulations show  
348 that local connectivity changes can dramatically affect response scaling, but only in the  
349 presence of feedforward I input.

### 350 *Connectivity effects on summation do not depend on connection sparsity or strength*

351 We next examined whether synaptic strength and connection sparsity can change the role of  
352 feedforward inhibition in response scaling. We expected that varying the total recurrent  
353 input that neurons receive would change non-linearity of responses (as predicted by theory,  
354 Ahmadian et al., 2013; van Vreeswijk and Sompolinsky, 1996), as long as the network  
355 remained stable. Therefore, we varied total input in two ways, by varying connection  
356 sparsity and by varying synaptic strength (Fig. 5). Experimental estimates of local  
357 connection sparsity range as high as 10-20% (*i.e.* each neuron connects to 10-20% of nearby  
358 neurons, Braitenberg and Schüz, 2001; Lefort et al., 2009). But the effective sparsity of  
359 connections might be lower, as connection probability in cortical networks is known to fall  
360 off with distance. Average network connection probabilities might thus be lower than the  
361 measurements, which were obtained for nearby neurons. Therefore, to examine the effects  
362 of changing connection probability, we varied sparsity between 2-20%. We found that in all  
363 these cases, adding feedforward inhibitory drive allowed more sublinear responses (Fig. 5;  
364 green lines always lie below blue lines in Fig. 5A). We observed more linear scaling when  
365 we increased the strength of all synapses together, and a bigger range of possible scaling  
366 (from supralinear to sublinear) when we decreased synaptic strength. These results show  
367 that, in networks that use a range of connection strength and sparsity, feedforward  
368 inhibition enables local E and I connectivity to have similar effects on response scaling,  
369 though the networks became more linear as connectivity strength increased.

### 370 *Summation in our data and past data can be explained by a model with feedforward inhibition*

371  
372 Next, we asked whether a model that incorporates realistic optogenetic input shows the  
373 same scaling dependence on feedforward inhibition we have observed. Up to this point, we  
374 have examined the behavior of simulated networks only by scaling a feedforward input  
375 (Figs. 3-5). We have implemented this feedforward input to simulate the way input spikes  
376 change conductance in neurons, by modulating the firing rate of a (Poisson) stochastic point  
377 process. Using these input spike trains, the sum of feedforward synaptic inputs in a given  
378 network neuron has substantial fluctuations about its mean. In contrast, experimental  
379 ChR2 stimulation activates many channels, and produces conductance changes with much  
380 smaller fluctuation about the mean. Thus, it might be possible that the scaling behavior we  
381 studied experimentally, with ChR2 combined with visual stimuli, would differ from the  
382 combinations of feedforward input we simulated in Figs. 3-5. To determine if there was a  
383 difference, we simulated ChR2 input by changing conductance and combined this with  
384 feedforward input (Fig. 6), and found that combinations of ChR2 and visual inputs  
385 produced qualitatively similar effects to the effects we had previously seen. Combinations  
386 of simulated ChR2 and visual input (Fig. 6A) showed slightly increased sublinearity when  
387 compared to a single scaled visual input (cf. Fig. 3B). (We also saw some slight sublinearity  
388 in our measurements of responses to combined ChR2 and visual input in mouse V1, Fig. 1)  
389 However, as with simulated visual input (Figs. 3-5), we found that with paired conductance

390 (ChR2) and spiking (visual) inputs, more sublinearity is possible when the feedforward input  
391 combines inhibitory and excitatory targets than when feedforward input targets only  
392 excitatory neurons (Fig. 6B-C). And, in the presence of feedforward inhibition, moderate  
393 changes in network connectivity can modify scaling behavior (Fig. 6D). In sum, in the  
394 models that simulate visual input alone (Figs. 3-5), and the models that simulate combined  
395 visual and ChR2 (conductance) inputs (Fig. 6), the role of feedforward inhibition and I-I  
396 connectivity in response scaling is similar.

397 We next asked what combinations of connectivity and feedforward input could describe  
398 both our data and past measurements. We constructed a model with combined visual  
399 (spiking) and ChR2 (conductance) inputs, and fit evoked rates to our data. Our data (Fig.  
400 6E) was well-matched by the simulations that showed small sublinearity (Fig. 6A-D). The  
401 data was similar to two different sets of network simulation parameters. Networks with  
402 only feedforward excitation showed responses that paralleled the data (Fig. 6B). But  
403 networks with both feedforward excitation and inhibition could also describe our data when  
404 the network local connectivity was adjusted (Fig. 6D). Since feedforward inhibition is a  
405 common feature of cortical networks in many species (Douglas and Martin, 2004), a model  
406 using feedforward inhibition seems a good choice to describe experimentally measured  
407 response scaling. Further, with feedforward inhibition, changes in local (e.g. I-I)  
408 connectivity can change response scaling from linear to sublinear, describing not just our  
409 data but also past data. These simulations show that a wide regime of cortical scaling  
410 behavior, from linear (as seen here in mouse V1 and also in the tree shrew (Huang et al.,  
411 2014)), to strongly sublinear (as seen in primate V1, Nassi et al., 2015), can be achieved by a  
412 model with feedforward inhibition. In sum, the simulations show that a model with  
413 feedforward inhibition can describe both our data and past observations.

#### 414 ***PV neuron stimulation effects are explained by the model with feedforward inhibition***

415 We next tested the model against data obtained by pairing visual and optogenetic  
416 stimulation of parvalbumin-positive (PV) cells. A majority of cortical PV inhibitory neurons  
417 are soma-targeting fast-spiking basket cells (Kawaguchi and Kubota, 1997; Tremblay et al.,  
418 2016), which are well-positioned to act as the balancing population in the network models.  
419 We found that stimulating PV neurons with ChR2 in awake mice produces a moderate  
420 suppression of visual responses, with a larger change in baseline rates than in stimulus  
421 responses. As before, we measure the visual response relative to the preceding baseline  
422 firing rate, which is changed by optogenetic stimulation. The optogenetic stimulation  
423 lowered the baseline firing rate by a substantial amount (from 5.4 spk/s to 2.4 spk/s, a 57%  
424 reduction), and reduced the response to a high contrast visual stimulus by a smaller amount  
425 (from 7.6 to 5.3 spk/s or 29%; Fig. 7A-B).

426 We then used this PV-ChR2 stimulation data to determine which models in Fig. 6 fit both  
427 the excitatory and PV stimulation mouse V1 data. As with the simulations in which  
428 excitatory neurons received ChR2 (conductance) input, we simulated the effects of  
429 optogenetic stimulation of PV cells by delivering a conductance input to PV neurons in the  
430 models. We adjusted the size of the conductance input to match the firing rate changes we  
431 saw in the data (Fig. 7C). The two models that fit the near-linear responses to excitatory  
432 stimulation (Fig. 6) are the model without feedforward inhibition (Fig. 6B), and the model  
433 with feedforward inhibition and local synapses adjusted to produce near-linear responses

434 (Fig. 6D). For each of those two models, we simulated optogenetic input to PV cells, and  
435 measured the change in visual response size with and without optogenetic PV input. We  
436 found that the model without feedforward inhibition disagreed with the PV-ChR2 data,  
437 displaying very strong suppression (Fig. 7C). Only the model with feedforward inhibition  
438 (Fig. 7D) showed the same scaling (moderate suppression) seen in the PV-ChR2 data. The  
439 reduced suppression in the model with feedforward inhibition might be due to a smaller  
440 proportion of PV total input coming from optogenetic stimulation in that model, compared  
441 to the model where PV cells receive no direct feedforward input. In sum, optogenetic  
442 perturbations of excitatory and PV-positive cells are described by a cortical recurrent  
443 network model that requires feedforward inhibition.

444 In sum, our data shows that average response summation for excitatory input in mouse V1  
445 is close to linear, even though individual cells can be nonlinear. Linear summation holds  
446 even for substantial shifts in firing rate (ChR2-induced firing rate changes of 10-15 spk/s,  
447 approximately the same size as the maximum visual response, Fig. 1). Using a numerical  
448 model of conductance-based spiking neurons, we find that response scaling is affected  
449 dramatically by synaptic connectivity. Moderate changes in synaptic coupling (~20%)  
450 between inhibitory cells can change response scaling from linear to sublinear (Figs. 4-6).  
451 Further, the change in inhibitory-to-inhibitory (I-I) connectivity that leads to sublinear  
452 summation only yields such sublinear summation in the presence of feedforward inhibition.

## 453 Discussion

454 It might seem surprising that we observed linear responses and not divisive normalization,  
455 where adding an additional stimulus yields reduction of the responses to a single stimulus.  
456 This form of sublinear summation has been observed in different visual cortical areas of  
457 several species. Linear summation, on the other hand, is also commonly seen at various  
458 stages of sensory systems, and both linear and sublinear responses may be useful at different  
459 levels (Carandini and Heeger, 2012). Linear summation may be more desirable when  
460 responses at different locations should receive equal weight, as when an organism must  
461 sensitively detect a distant predator, or when spikes that occur at different times should  
462 produce the same downstream effect. In fact, computer vision systems often use both linear  
463 and normalization steps in distinct layers or networks (Carandini and Heeger, 2012; Yamins  
464 and DiCarlo, 2016). Experimentally, normalization is usually measured with sensory  
465 stimuli, not with direct cortical input, and thus normalization might partially depend on  
466 subcortical (e.g. thalamic gain control, Bonin et al., 2006) or feedback effects.

467 In fact, the linear responses we observed with excitatory optogenetic stimulation in mouse  
468 primary visual cortex are similar to those seen in tree shrew visual cortex (Huang et al.,  
469 2014), but are different than the sublinear responses seen in macaque visual cortex (Nassi et  
470 al., 2015). Our simulations show that a broadly similar cortical architecture can support  
471 both kinds of scaling of feedforward input, subject to moderate adjustments in local  
472 connectivity. The linear responses we saw in the mouse differ from those of Sato et al.  
473 (2014), who also delivered combinations of excitatory optogenetic and visual input to  
474 mouse V1 neurons and found sublinearity under certain conditions. However, Sato et al.  
475 used an experimental approach different than the other three studies (macaque, tree shrew  
476 and our study in mouse), in which they optogenetically elicited antidromic input spikes by  
477 stimulating the contralateral hemisphere from which they were recording. Comparing these  
478 two types of input may shed additional light on how cortical circuits transform inputs to  
479 outputs.

480 To stimulate many V1 neurons, we delivered optogenetic input to multiple neurons  
481 simultaneously. We used a blue light spot a few hundred  $\mu\text{m}$  in diameter, comparable to the  
482 region of mouse V1 activated by our small visual stimulus. Many neurons in the cortex  
483 change their firing rate in response to even small sensory stimuli (Bonin et al., 2011; Van  
484 Essen et al., 1984). Anatomically, sensory input that arrives to multiple cells is common, as  
485 in the case of divergent feedforward thalamic input to the cortex (Reid, 2001). Single axons  
486 from the thalamus often ramify across several hundred microns of the cortex (Braitenberg  
487 and Schüz, 2001; Garraghty and Sur, 1990), and thalamic axons projecting to the visual  
488 cortex can make synapses on dozens of excitatory cortical cells (Freund et al., 1989).

489 Optogenetic stimuli may lead to firing rate changes in other parts of the brain besides the  
490 area stimulated. But perhaps because the majority of synapses made by cortical neurons are  
491 within the same cortical area, local intracortical effects for optogenetic stimuli like these  
492 have been observed to be larger than effects on the visual thalamus (Li et al., 2013; Olsen et  
493 al., 2012). This is true even though the visual thalamus (dorsal lateral geniculate) receives a  
494 large proportion of all projections out of V1 (Reid, 2001). Thus, the neurons best suited to  
495 act as the recurrent population in the model may be other V1 neurons, and perhaps even

496 neurons within a few hundred microns of the neurons receiving input, where the probability  
497 of recurrent connectivity is highest (Lefort et al., 2009). However, other neurons in the  
498 brain could also in principle contribute to the recurrent population.

499 Our results show that network mechanisms can contribute to response summation. The  
500 model neurons are leaky integrate-and-fire neurons, so individual model neurons sum their  
501 subthreshold inputs linearly, and the nonlinear spiking responses we characterize likely arise  
502 from how E and I neurons interact. We chose this model architecture because we judged it  
503 the simplest model that could capture both excitatory-inhibitory interactions and also single-  
504 cell nonlinearities due to refractory period, Vm fluctuations, spike threshold, and  
505 conductance changes (Chance et al., 2002; Richardson, 2004). There are, however, other  
506 single-cell mechanisms, such as short-term synaptic plasticity or dendritic nonlinearity  
507 (Häusser et al., 2000; Silver, 2010) that might additionally contribute to even more  
508 nonlinear summation, both below threshold and in spike responses. On the other hand,  
509 dendritic nonlinearities might also have roles that do not affect scaling, as for example  
510 nonlinearities can be used to amplify distant input synapses so that different synapses  
511 produce equal responses at the soma (Katz et al., 2009).

512 We adjusted synaptic coupling between (E and/or I) populations by changing the strength  
513 of a set of fixed connections between the desired populations. Because in sparse networks  
514 like this neurons share only a small fraction of their input, we expected increases in synaptic  
515 strength to achieve the same qualitative result as adding new synapses, even if the two types  
516 of changes may not have exactly proportional effects on the behavior of the network. Fig. 5  
517 shows that feedforward inhibition allows more sublinearity across changes in both synaptic  
518 strength and synapse number.

519 Feedforward inhibition is included in the canonical cortical microcircuit framework  
520 (Douglas and Martin, 2004) because it is a stereotypical feature of many cortical areas. In  
521 sensory cortical areas, including the visual cortex, it has been observed that input thalamic  
522 neurons make synapses both onto excitatory principal cells and onto inhibitory basket cells.  
523 Such feedforward inhibitory connectivity has been observed both with anatomical and  
524 physiological methods (Isaacson and Scanziani, 2011). Since inhibitory basket cells project  
525 strongly back to excitatory cells, inhibitory changes due to thalamic input arrive to principal  
526 cells a few milliseconds after the first excitatory changes. This delay of a few milliseconds  
527 between the arrival of excitation and inhibition can be used to align spike outputs of cortical  
528 neurons (Cruikshank et al., 2007; Gabernet et al., 2005; Swadlow, 2003; Tiesinga et al.,  
529 2008). Beyond shaping the timing of spike responses, however, it has been previously noted  
530 that feedforward inhibition might also be used to control the magnitude of spiking responses  
531 to thalamic input. Douglas et al. (Douglas et al., 1995) proposed that spike responses can be  
532 shaped by preferential amplification of either excitation or inhibition in cortical recurrent  
533 networks, where amplification might arise by connections within populations of excitatory  
534 or inhibitory neurons. Ahmadian and Miller (2013) later showed that rate-based networks  
535 with an excitatory and inhibitory term that are stable (so that the network does not e.g.  
536 diverge and become epileptic) have regimes of both linearity and sublinearity, although it is  
537 not yet clear which of these regimes spiking networks operate in, and which cellular or  
538 synaptic parameters affect summation. In Ahmadian and Miller's model, individual cells  
539 can be supralinear (Priebe and Ferster, 2008), but when external drive arrives to multiple

540 cells, supralinearity is also seen when recurrent connections are weak and thus excitation  
541 and inhibition are not strongly coupled. This may explain why we saw supralinear  
542 responses only in the model network with the weakest synaptic connectivity (Fig. 5).

543 Substantial recurrent intracortical response is elicited by sensory input, with approximately  
544  $2/3^{\text{rd}}$  of synaptic input after a sensory stimulus arising from recurrent synapses (Li et al.,  
545 2013; Lien and Scanziani, 2013). If recurrent connectivity is very strong, previous modeling  
546 results (Renart et al., 2010; van Vreeswijk and Sompolinsky, 1996) predict that excitatory  
547 and inhibitory populations are forced by the strong coupling to track each others' activity  
548 closely, resulting in linear responses. In accord with this prediction about strongly-coupled  
549 networks, we observed increasing linearity when we increased synaptic strength (Fig. 5) as  
550 long as the network remained stable. However, for very strong recurrent connectivity,  
551 feedforward connectivity must also be very strong to drive any response (Ahmadian et al.,  
552 2013; see also our Fig. 5), which appears non-physiological (Li et al., 2013; Lien and  
553 Scanziani, 2013). Our simulations use synapses of moderate size (order 1mV with 2%  
554 sparsity as in Figs. 3,4,6 and Fig. 5 row 4; see Methods), requiring tens of PSPs to combine  
555 to produce a spike, as seen in cortical neurons (Barral and Reyes, 2016). These observations  
556 suggest that the differences in scaling we observed occur in a range of moderate synaptic  
557 strengths: low enough to avoid obligate linearity, and high enough to allow recurrent  
558 connections to contribute substantially to network input-output functions.

559 We found that a network model can link local connectivity to network physiological  
560 responses in ways that might be difficult to predict without the model. It has been difficult  
561 to measure many of the synapses in a brain volume, but connectomic methods (Briggman et  
562 al., 2011; Lee et al., 2016) promise to make such comprehensive synaptic mapping possible  
563 even in column-sized volumes of the cortex. Combining approaches for controlling input  
564 with methods to measure connectivity will be useful to shed light on an important part of  
565 brain computation – the input-output transformations of populations of connected cells.

566



## References

- 567  
568  
569 Ahmadian, Y., Rubin, D.B., and Miller, K.D. (2013). Analysis of the stabilized supralinear  
570 network. *Neural computation* 25, 1994-2037.
- 571 Barral, J., and Reyes, A.D. (2016). Synaptic scaling rule preserves excitatory-inhibitory balance  
572 and salient neuronal network dynamics. *Nature Neuroscience* 19, 1690-1700.
- 573 Bonin, V., Histed, M.H., Yurgenson, S., and Reid, R.C. (2011). Local diversity and fine-scale  
574 organization of receptive fields in mouse visual cortex. *Journal of Neuroscience* 31,  
575 18506-18521.
- 576 Bonin, V., Mante, V., and Carandini, M. (2006). The statistical computation underlying contrast  
577 gain control. *Journal of Neuroscience* 26, 6346-6353.
- 578 Braitenberg, V., and Schüz, A. (2001). *Cortex: Statistics and Geometry of Neuronal*  
579 *Connectivity*. In: *Neuro-und Sinnesphysiologie* }.
- 580 Brette, R., Rudolph, M., Carnevale, T., Hines, M., Beeman, D., Bower, J.M., Diesmann, M.,  
581 Morrison, A., Goodman, P.H., Harris, F.C., *et al.* (2007). Simulation of networks of  
582 spiking neurons: a review of tools and strategies. *Journal of computational neuroscience*  
583 23, 349-398.
- 584 Briggman, K.L., Helmstaedter, M., and Denk, W. (2011). Wiring specificity in the direction-  
585 selectivity circuit of the retina. *Nature* 471, 183-188.
- 586 Brunel, N. (2000). Dynamics of sparsely connected networks of excitatory and inhibitory spiking  
587 neurons. *Journal of computational neuroscience* 8, 183-208.
- 588 Carandini, M., and Heeger, D.J. (2012). Normalization as a canonical neural computation. *Nat*  
589 *Rev Neurosci* 13, 51-62.
- 590 Chance, F.S., Abbott, L.F., and Reyes, A.D. (2002). Gain modulation from background synaptic  
591 input. *Neuron* 35, 773-782.
- 592 Chen, J.L., Flanders, G.H., Lee, W.-C.A., Lin, W.C., and Nedivi, E. (2011). Inhibitory dendrite  
593 dynamics as a general feature of the adult cortical microcircuit. *Journal of Neuroscience*  
594 31, 12437-12443.
- 595 Connors, B.W., Gutnick, M.J., and Prince, D.A. (1982). Electrophysiological properties of  
596 neocortical neurons in vitro. *J Neurophysiol* 48, 1302-1320.
- 597 Cruikshank, S.J., Lewis, T.J., and Connors, B.W. (2007). Synaptic basis for intense  
598 thalamocortical activation of feedforward inhibitory cells in neocortex. *Nat Neurosci* 10,  
599 462-468.
- 600 Destexhe, A., and Paré, D. (1999). Impact of network activity on the integrative properties of  
601 neocortical pyramidal neurons in vivo. *J Neurophysiol* 81, 1531-1547.
- 602 Destexhe, A., Rudolph, M., and Paré, D. (2003). The high-conductance state of neocortical  
603 neurons in vivo. *Nat Rev Neurosci* 4, 739-751.
- 604 Douglas, R.J., Koch, C., Mahowald, M., Martin, K.A., and Suarez, H.H. (1995). Recurrent  
605 excitation in neocortical circuits. *Science* 269, 981-985.
- 606 Douglas, R.J., and Martin, K.A.C. (2004). Neuronal circuits of the neocortex. *Annu Rev*  
607 *Neurosci* 27, 419-451.
- 608 Freund, T.F., Martin, K.A., Soltesz, I., Somogyi, P., and Whitteridge, D. (1989). Arborisation  
609 pattern and postsynaptic targets of physiologically identified thalamocortical afferents in  
610 striate cortex of the macaque monkey. *J Comp Neurol* 289, 315-336.

- 611 Gabernet, L., Jadhav, S.P., Feldman, D.E., Carandini, M., and Scanziani, M. (2005).  
612 Somatosensory integration controlled by dynamic thalamocortical feed-forward  
613 inhibition. *Neuron* 48, 315-327.
- 614 Garraghty, P.E., and Sur, M. (1990). Morphology of single intracellularly stained axons  
615 terminating in area 3b of macaque monkeys. *J Comp Neurol* 294, 583-593.
- 616 Glickfeld, L.L., Histed, M.H., and Maunsell, J.H.R. (2013). Mouse primary visual cortex is used  
617 to detect both orientation and contrast changes. *J Neurosci* 33, 19416-19422.
- 618 Gorski, J.A., Talley, T., Qiu, M., Puellas, L., Rubenstein, J.L.R., and Jones, K.R. (2002). Cortical  
619 excitatory neurons and glia, but not GABAergic neurons, are produced in the Emx1-  
620 expressing lineage. *J Neurosci* 22, 6309-6314.
- 621 Häusser, M., Spruston, N., and Stuart, G.J. (2000). Diversity and dynamics of dendritic  
622 signaling. *Science* 290, 739-744.
- 623 Histed, M.H., and Maunsell, J.H.R. (2013). Cortical neural populations can guide behavior by  
624 integrating inputs linearly, independent of synchrony. *Proc Natl Acad Sci USA*.
- 625 Huang, X., Elyada, Y.M., Bosking, W.H., Walker, T., and Fitzpatrick, D. (2014). Optogenetic  
626 assessment of horizontal interactions in primary visual cortex. *Journal of Neuroscience*  
627 34, 4976-4990.
- 628 Isaacson, J.S., and Scanziani, M. (2011). How inhibition shapes cortical activity. *Neuron* 72,  
629 231-243.
- 630 Katz, Y., Menon, V., Nicholson, D.A., Geinisman, Y., Kath, W.L., and Spruston, N. (2009).  
631 Synapse distribution suggests a two-stage model of dendritic integration in CA1  
632 pyramidal neurons. *Neuron* 63, 171-177.
- 633 Kawaguchi, Y., and Kubota, Y. (1997). GABAergic cell subtypes and their synaptic connections  
634 in rat frontal cortex. *Cereb Cortex* 7, 476-486.
- 635 Koike, H., Mano, N., Okada, Y., and Oshima, T. (1970). Repetitive impulses generated in fast  
636 and slow pyramidal tract cells by intracellularly applied current steps. *Exp Brain Res* 11,  
637 263-281.
- 638 Lee, W.-C.A., Bonin, V., Reed, M., Graham, B.J., Hood, G., Glattfelder, K., and Reid, R.C.  
639 (2016). Anatomy and function of an excitatory network in the visual cortex. *Nature* 532,  
640 370-374.
- 641 Lefort, S., Tamm, C., Floyd Sarria, J.-C., and Petersen, C.C.H. (2009). The excitatory neuronal  
642 network of the C2 barrel column in mouse primary somatosensory cortex. *Neuron* 61,  
643 301-316.
- 644 Li, Y.-t., Ibrahim, L.A., Liu, B.-h., Zhang, L.I., and Tao, H.W. (2013). Linear transformation of  
645 thalamocortical input by intracortical excitation. *Nat Neurosci* 16, 1324-1330.
- 646 Lien, A.D., and Scanziani, M. (2013). Tuned thalamic excitation is amplified by visual cortical  
647 circuits. *Nat Neurosci* 16, 1315-1323.
- 648 Nassi, J.J., Avery, M.C., Cetin, A.H., Roe, A.W., and Reynolds, J.H. (2015). Optogenetic  
649 Activation of Normalization in Alert Macaque Visual Cortex. *Neuron* 86, 1504-1517.
- 650 Nikolic, K., Grossman, N., Grubb, M.S., Burrone, J., Toumazou, C., and Degenaar, P. (2009).  
651 Photocycles of channelrhodopsin-2. *Photochem Photobiol* 85, 400-411.
- 652 Olsen, S.R., Bortone, D.S., Adesnik, H., and Scanziani, M. (2012). Gain control by layer six in  
653 cortical circuits of vision. *Nature* 483, 47-52.

- 654 Priebe, N.J., and Ferster, D. (2008). Inhibition, spike threshold, and stimulus selectivity in  
655 primary visual cortex. *Neuron* 57, 482-497.
- 656 Reid, R.C. (2001). Divergence and reconvergence: multielectrode analysis of feedforward  
657 connections in the visual system. *Prog Brain Res* 130, 141-154.
- 658 Renart, A., de la Rocha, J., Bartho, P., Hollender, L., Parga, N., Reyes, A., and Harris, K.D.  
659 (2010). The asynchronous state in cortical circuits. *Science* 327, 587-590.
- 660 Richardson, M.J.E. (2004). Effects of synaptic conductance on the voltage distribution and firing  
661 rate of spiking neurons. *Phys Rev E Stat Nonlin Soft Matter Phys* 69, 051918.
- 662 Richardson, M.J.E. (2007). Firing-rate response of linear and nonlinear integrate-and-fire  
663 neurons to modulated current-based and conductance-based synaptic drive. *Phys Rev E*  
664 *Stat Nonlin Soft Matter Phys* 76, 021919.
- 665 Rubin, D.B., Van Hooser, S.D., and Miller, K.D. (2015). The stabilized supralinear network: a  
666 unifying circuit motif underlying multi-input integration in sensory cortex. *Neuron* 85,  
667 402-417.
- 668 Sato, T.K., Häusser, M., and Carandini, M. (2014). Distal connectivity causes summation and  
669 division across mouse visual cortex. *Nat Neurosci* 17, 30-32.
- 670 Silver, R.A. (2010). Neuronal arithmetic. *Nat Rev Neurosci* 11, 474-489.
- 671 Steriade, M., Timofeev, I., and Grenier, F. (2001). Natural waking and sleep states: a view from  
672 inside neocortical neurons. *J Neurophysiol* 85, 1969-1985.
- 673 Swadlow, H.A. (2003). Fast-spike interneurons and feedforward inhibition in awake sensory  
674 neocortex. *Cereb Cortex* 13, 25-32.
- 675 Tiesinga, P., Fellous, J.-M., and Sejnowski, T.J. (2008). Regulation of spike timing in visual  
676 cortical circuits. *Nat Rev Neurosci* 9, 97-107.
- 677 Tremblay, R., Lee, S., and Rudy, B. (2016). GABAergic Interneurons in the Neocortex: From  
678 Cellular Properties to Circuits. *Neuron* 91, 260-292.
- 679 Van Essen, D.C., Newsome, W.T., and Maunsell, J.H. (1984). The visual field representation in  
680 striate cortex of the macaque monkey: asymmetries, anisotropies, and individual  
681 variability. *Vision Res* 24, 429-448.
- 682 van Vreeswijk, C., and Sompolinsky, H. (1996). Chaos in neuronal networks with balanced  
683 excitatory and inhibitory activity. *Science* 274, 1724-1726.
- 684 van Vreeswijk, C., and Sompolinsky, H. (1998). Chaotic balanced state in a model of cortical  
685 circuits. *Neural computation* 10, 1321-1371.
- 686 Vogels, T.P., and Abbott, L.F. (2005). Signal propagation and logic gating in networks of  
687 integrate-and-fire neurons. *Journal of Neuroscience* 25, 10786-10795.
- 688 Yamins, D.L.K., and DiCarlo, J.J. (2016). Using goal-driven deep learning models to understand  
689 sensory cortex. *Nat Neurosci* 19, 356-365.

690  
691

## 692 **Figures**

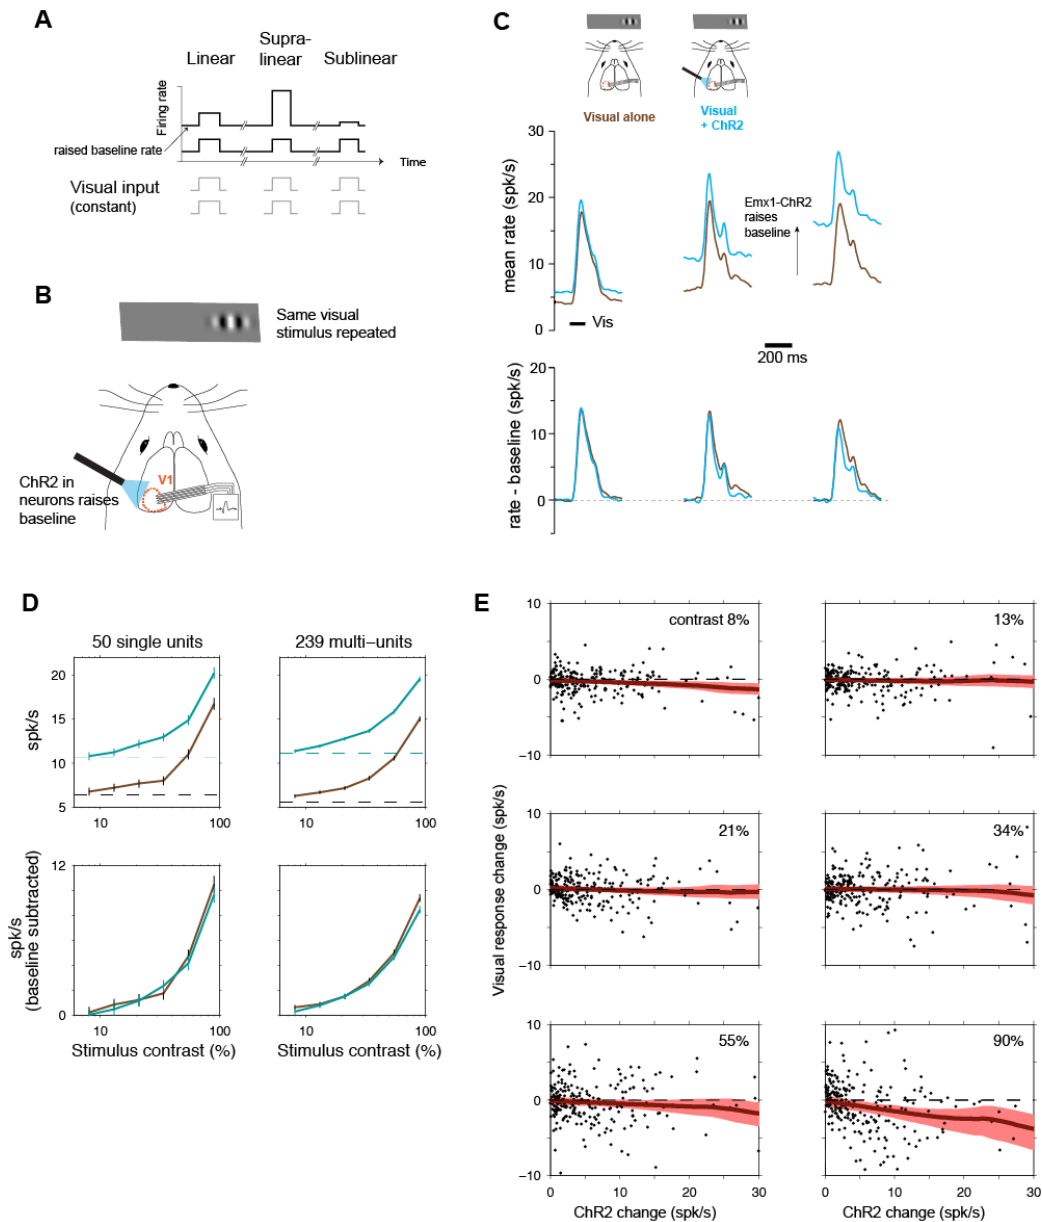

693

694 **Figure 1: Near-linear scaling with excitatory optogenetic stimulation in mouse V1. A.**  
 695 Schematic of experimental stimulus protocol. If scaling is linear, the same input pulse  
 696 produces the same response when baseline (spontaneous) rate is changed. **B.** We raise  
 697 baseline rates using ChR2 in excitatory (E) neurons (Cre-dependent virus in Emx1-Cre  
 698 mouse line.) **C,** Population histograms showing responses to combined ChR2 and visual  
 699 (90% contrast) stimuli. Top row: columns show three groups of neurons, divided based on  
 700 size of ChR2 baseline firing rate changes, left: smallest ChR2 effects (N=94; 36 single, 58  
 701 multi-units), middle: intermediate ChR2 effects (N=101; 31 single-, 70 multi-units), right:  
 702 largest ChR2 effects (N=94; 28 single-, 66 multi-units), Brown: responses to visual stimulus  
 703 with no optogenetic stimulus. Cyan: responses to visual stimulus when baseline rates are  
 704 changed by sustained optogenetic stimulus. Bottom row: Same data as top row, with  
 705 spontaneous firing rates subtracted. Visual responses differ somewhat between columns  
 706 because each column is a different group of neurons, but within each group there is little

707 response change as spontaneous rate varies. **D**, Linear scaling is seen across a wide contrast  
708 range. Top row: responses without baseline subtraction. Bottom row: baseline subtracted.  
709 Errorbars: SEM of pooled unit responses. **E**, Linear scaling is seen on average, across  
710 neurons with a variety of ChR2-induced baseline rate changes, with some weak sublinearity  
711 at the highest rate changes and highest contrasts. Y axes: difference in visual responses  
712 (relative to baseline) with and without ChR2 stimulation; dashed line at zero shows a  
713 perfectly linear response. Red: lowess regression, shaded region is a bootstrapped 95%  
714 confidence interval. Two outlier points in 90% contrast plot are omitted for visual clarity  
715 although they are included in the regression; the two outliers are shown in Fig. 2A.

716

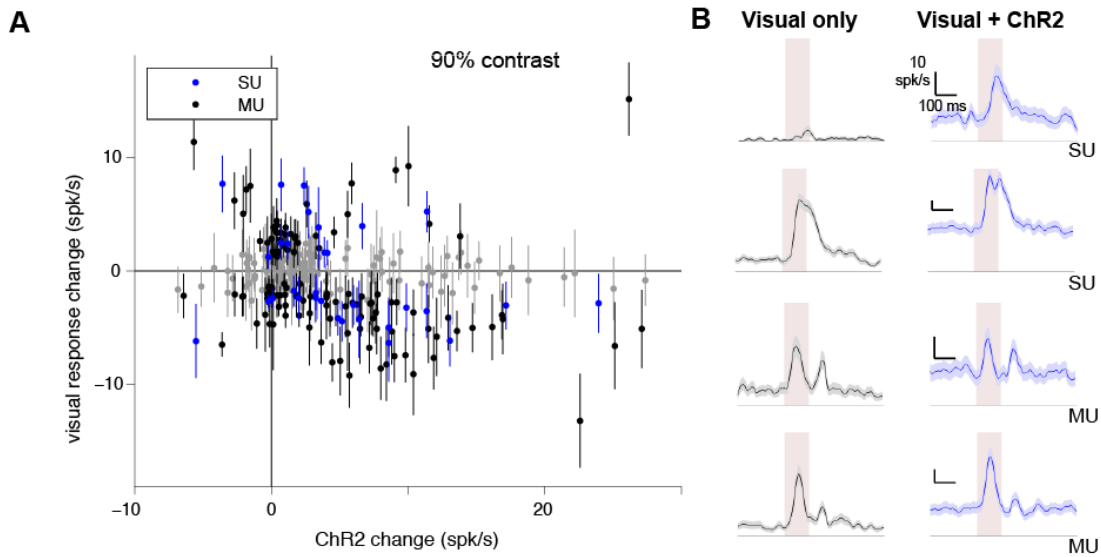

717 **Figure 2: Different units can be sub- or supra-linear, though mean of population is near-**  
718 **linear.** **A**, Unit responses to excitatory neuron optogenetic (Emx1-ChR2) stimulation,  
719 showing that many individual units are significantly supra- or sub-linear. X-axis: average  
720 firing rate change with ChR2 stimulus, Y-axis: difference between visual responses (90%  
721 contrast; each visual response measured from preceding baseline) with and without  
722 optogenetic stimulus. Errorbars: SEM. Points that are at least 1 SEM away from  
723 horizontal line at zero (linear response) are colored blue (single units; SU) or black (multi-  
724 units; MU). Points within 1 SEM of linear are gray. Data are as in Fig. 1E for 90%  
725 contrast, here with std. err. for each point, and adding on the negative Y-axis the few units  
726 that are suppressed by stimulation. 34% of single units are significantly non-linear (17/50,  
727  $p < 0.01$ , KS test), and 28% of multi-units are significantly non-linear (67/239,  $p < 0.01$ , KS  
728 test). **B**, Four example units. Pink region shows visual stimulus presentation time. Shaded  
729 regions around mean response: SEM.

730

731 **Figure 3: Spiking model shows**  
 732 **sublinear scaling with**  
 733 **feedforward inhibition.**

734 **A**, Schematic of network  
 735 architecture. Blue: E cells,  
 736 green: I cells. The conductance-  
 737 based spiking model produces  
 738 stochastic  $V_m$  and spikes as seen  
 739 *in vivo*, and an example  
 740 membrane potential ( $V_m$ ) trace  
 741 from one excitatory cell is  
 742 shown. **B**, Response scaling as  
 743 feedforward (FF) input to E and  
 744 I cells is varied. To measure  
 745 response scaling, inputs to E  
 746 and/or I cells with rate given by  
 747 X,Y axes are delivered, and  
 748 average response over all E cells  
 749 is measured. Then, the E and I  
 750 input rates are multiplied by a  
 751 constant (here, 2) and the size of  
 752 the second response is compared  
 753 to the first. Percent change  
 754 shown by color, yellow: second  
 755 response is similar (linear), blue:  
 756 second response is smaller  
 757 (sublinear). Contour lines show  
 758 first response (spk/s). Response  
 759 rates below 5 spk/s and above  
 760 20 spk/s are masked (gray).  
 761 Average spontaneous rate is  
 762 adjusted to 5 spk/s (Methods),  
 763 and 33% of network neurons  
 764 receive external input, to  
 765 approximate the sparse set of  
 766 cortical neurons that typically  
 767 respond to sensory inputs (Fig.  
 768 1). Pink points show E and I  
 769 rate combinations used in C,D.  
 770 **C**, Near-linear responses to a  
 771 range of input sizes when  
 772 feedforward input is provided to  
 773 E cells only. Parameters here are  
 774 indicated by pink dot in B, and  
 775 first two responses here are the  
 776 same two responses used to compute  
 percent change shown in color there. Left  
 panel: average rates, right panel:  
 same data replotted showing change  
 (spk/s) in response (y-axis) as a  
 function of prior response (x-axis).  
 For these plots, a linear response is a

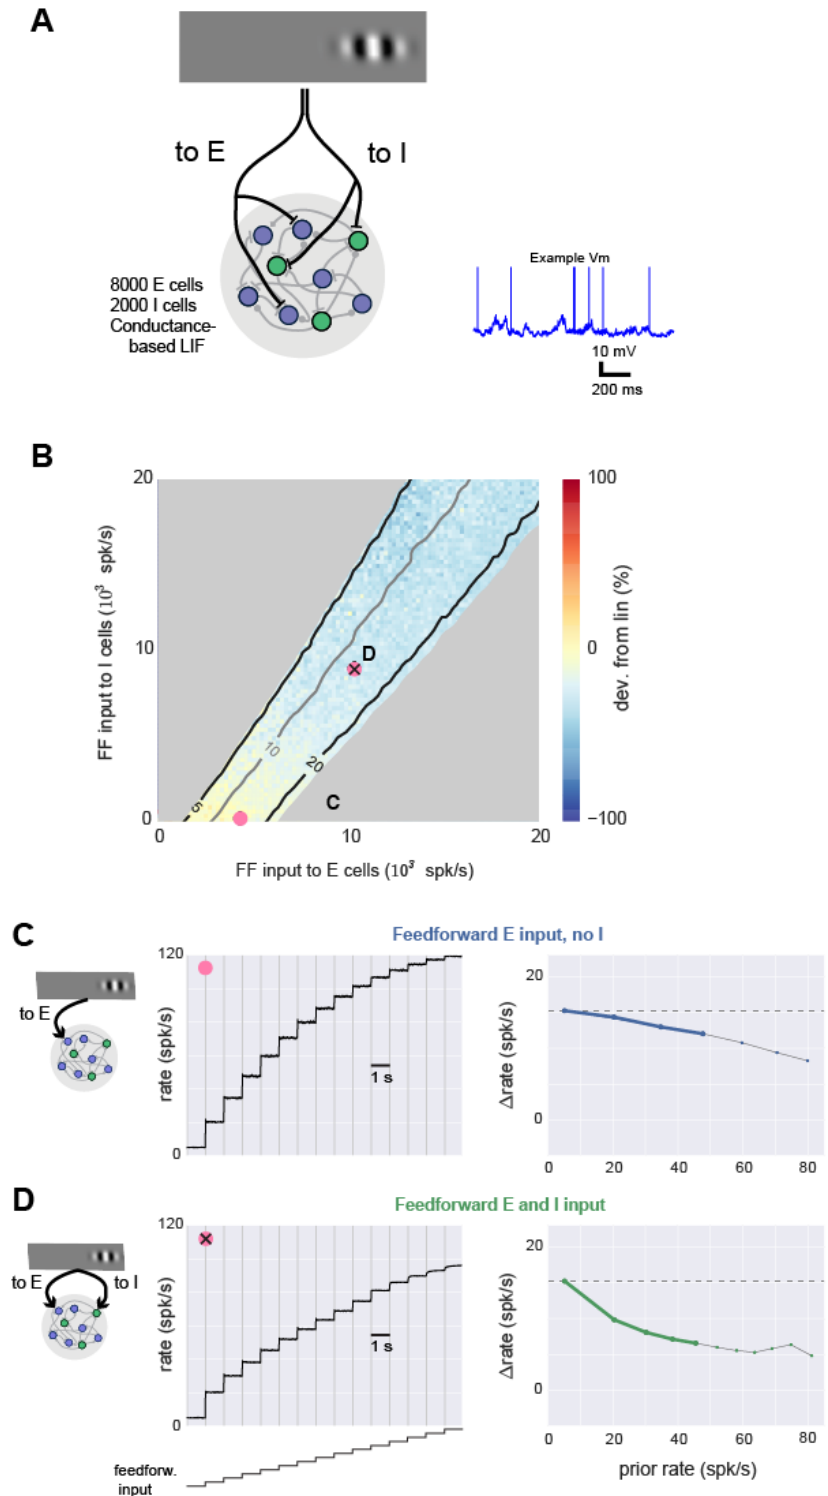



777 horizontal line (dashed gray line). Heavy lines: prior rates less than 50 spk/s, highlighting  
778 for visual clarity rates far from potential saturation caused by absolute refractory period (3  
779 ms). **D**, Sublinear responses to a range of input sizes when input provided to both E and I  
780 cells. Same conventions as C. In this case, heavy green line in right panel lies farther below  
781 horizontal than heavy blue line in C, showing more sublinear scaling.

782

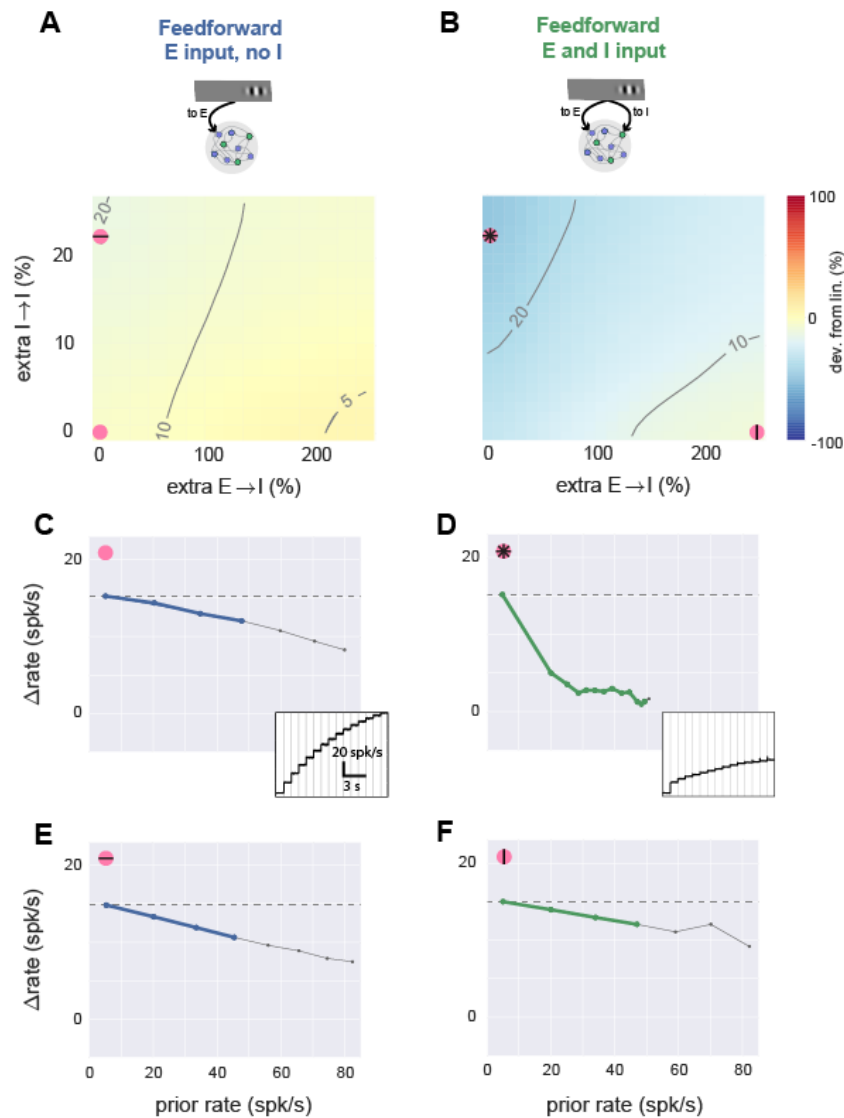

783 **Figure 4: With feedforward inhibition, network model can produce linear or sublinear**  
 784 **responses.** **A**, Simulations with feedforward input to E cells only, while local network  
 785 connectivity is varied. X-axis: E to I connection strength, y-axis, I to I connection strength.  
 786 Axes give percent change in total synaptic input that a single cell receives from one (E or I)  
 787 population (see Methods), where zero is a balanced network (e.g. Fig. 3) with equal  
 788 probability of synapses onto E and I cells. Other conventions as in Fig. 3B (contour lines  
 789 show evoked response to first stimulus, color shows percent difference in response to  
 790 doubled external stimulus). Spontaneous rate and external stimulus rates are constant for  
 791 entire panel. **B**, Simulations with feedforward input to E and I cells while local connectivity  
 792 is varied. Pink symbols show parameter regions where scaling is sublinear (stronger I->I  
 793 connectivity) or linear (stronger E->I connectivity). **C**, Scaling plot (response size as a  
 794 function of previous rate) for parameters shown by pink dot in A: no extra local  
 795 connections, feedforward E only, same parameters as Fig. 3C. Inset: timecourse of  
 796 responses to the step stimulus; subtracting each rate from rate at the previous step gives y-  
 797 axis in main panel. **D-F**, same plots, using parameters shown by corresponding pink dots in  
 798 B. Comparing D and E shows that large sublinearity can be produced by extra I->I  
 799 connections only with feedforward inhibition. Comparing D and F shows that linearity can  
 800 also be achieved with feedforward inhibition if E->I connectivity is strengthened.

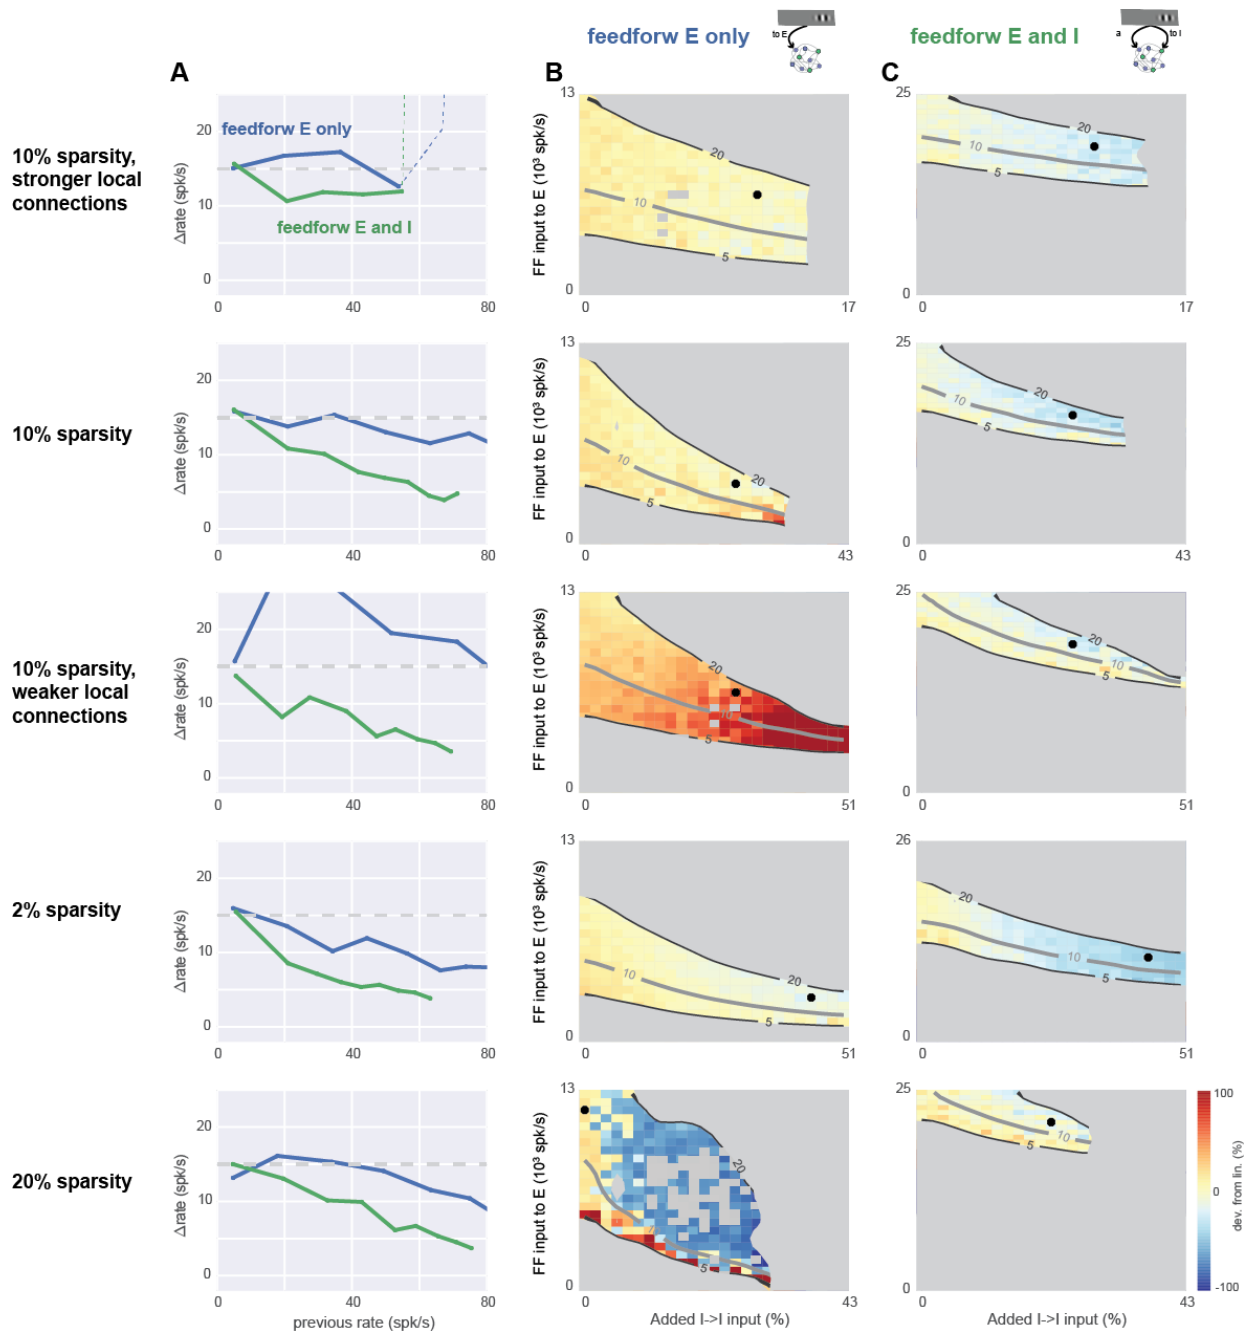

801

802 **Figure 5: Feedforward inhibition leads to sublinearity in networks with a range of**  
 803 **recurrent synaptic sparsities and synaptic strengths.** Top row: Simulations in the  
 804 conductance-based network with 10% connectivity, with strong synapses (each cell receives  
 805 10x more E and I input than in the networks of Figs. 3-4). Other rows show networks with  
 806 different sparsity and synaptic strength. The network of Figs. 3-4 is the fourth row (2%  
 807 sparsity, 1x strength). **A**, Scaling plots showing network response as a function of prior rate  
 808 before stimulus. Blue: feedforward E input only, parameters shown in column B. Green:  
 809 feedforward E and I input, corresponding parameters are shown in column C. In all rows,  
 810 feedforward inhibition (green) allows more sublinearity than feedforward excitation alone  
 811 (blue). Dashed line, top row: network instability (rates diverge). **B**, Average network  
 812 response as I-I synaptic strength (x-axis) and feedforward E input (y-axis) are varied. No

813 feedforward inhibition. Black dot shows parameters used to plot blue line in A (parameters  
814 chosen to maximize sublinearity). Gray regions mask areas where evoked rates are less  
815 than 5 spk/s or greater than 20 spk/s, or where network was unstable (rates diverged to  
816 maximum rate given by refractory period). Other conventions as in Fig. 3B, 4AB. **C**,  
817 network response as a function of I->I and feedforward E input, in the presence of  
818 feedforward inhibition. Individual gray squares seen in fifth row (20% sparsity) column B,  
819 inside the 5-20 spk/s contours indicate strongly irregular (non-monotonic) response scaling:  
820 strong sublinearity for at least one stimulus step, when both previous and later responses  
821 were linear or supralinear. Feedforward inhibition arrival rate to stimulated cells for each  
822 row, from top: 14k, 14k, 19k, 11k, 17k spk/s, chosen to give a 15 spk/s response for 3x the  
823 feedforward excitatory rate that alone produces a 15 spk/s response (see Fig. 3B). Fourth  
824 row (2% sparsity, same network as Figs. 3-4) uses 40% extra I->E connections to show  
825 linear responses are robust to many forms of connectivity variation.

826

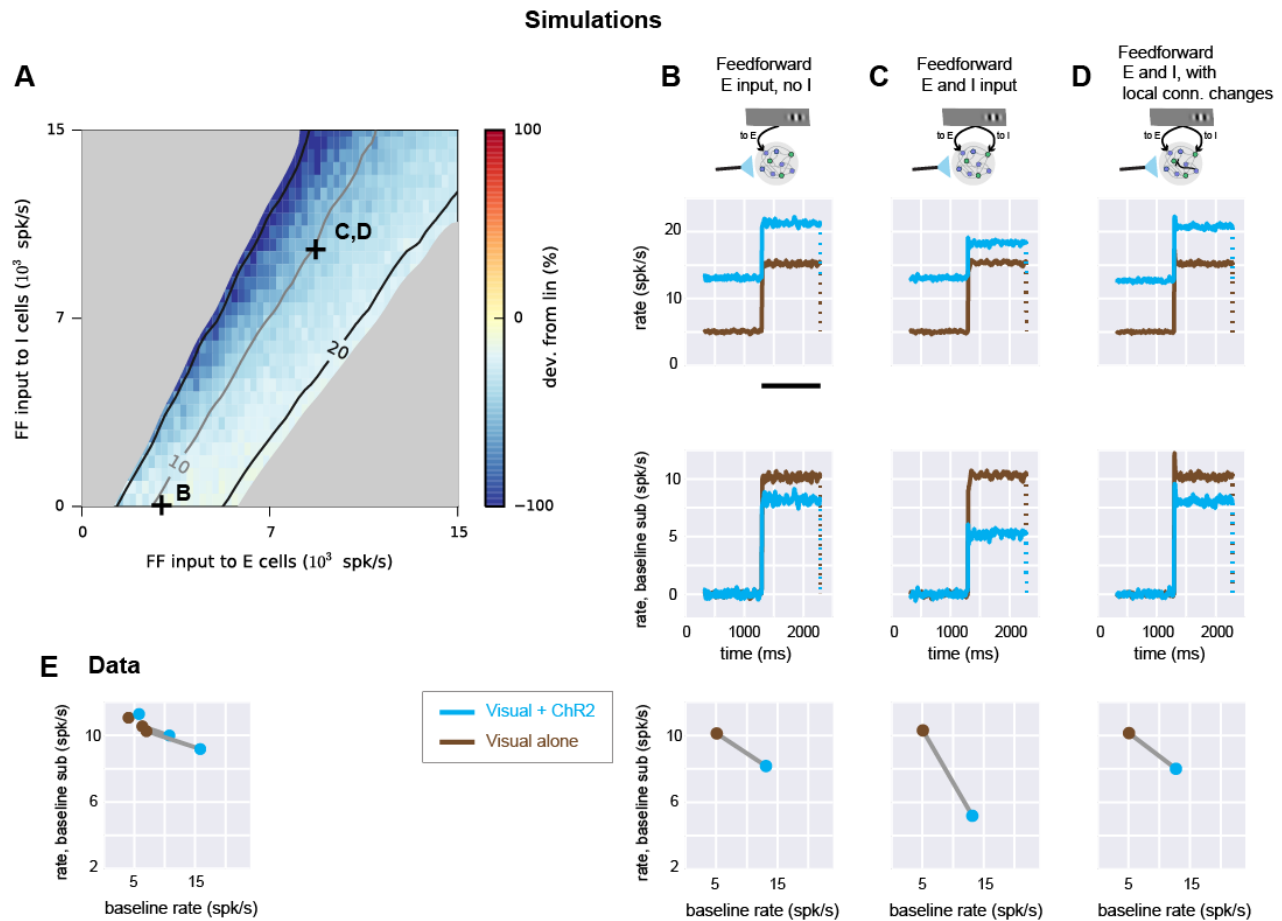

827 **Figure 6: Experimental linear scaling can be replicated in networks receiving**  
 828 **feedforward inhibition.** **A**, Simulation where conductance steps (ChR2 input) and  
 829 feedforward Poisson trains (visual input) are combined. Strength of feedforward E input (x-  
 830 axis) and feedforward I input (y-axis) are varied while spontaneous rate is set to 5 spk/s.  
 831 Connection sparsity is 2%. Other conventions as in Fig. 3B. Symbols (+) show values of E,I  
 832 input used in panels B-D. **B**, network responses when feedforward input is supplied to E  
 833 cells only. Top row: network responses (mean of E cell rates). Brown: feedforward Poisson  
 834 (visual) input only. Cyan: conductance (ChR2) input combined with visual input.  
 835 Conductance increase lasts for the full duration of the cyan trace. Visual input duration is  
 836 shown by black bar (bottom of plot). Dotted line indicates rates return to previous baseline  
 837 when feedforward input ends. Second row: same data as top row, with baseline rate  
 838 subtracted. Third row: response (y-axis) as a function of rate before feedforward input  
 839 begins (x-axis). **C**, same network simulations with feedforward input to both E and I cells  
 840 (parameters marked by C in panel A). **D**, network receiving feedforward input to both E  
 841 and I cells, but with stronger local connections from E to I cells (cf. Fig. 4, with similar  
 842 effect for two feedforward Poisson inputs instead of feedforward input paired with  
 843 conductance step as shown here). **E**, data from Fig. 1C plotted to show how responses scale  
 844 as baseline is changed. Three lines (brown: no ChR2, cyan: with ChR2) are the three  
 845 groups of recorded neurons shown in Fig. 1C.

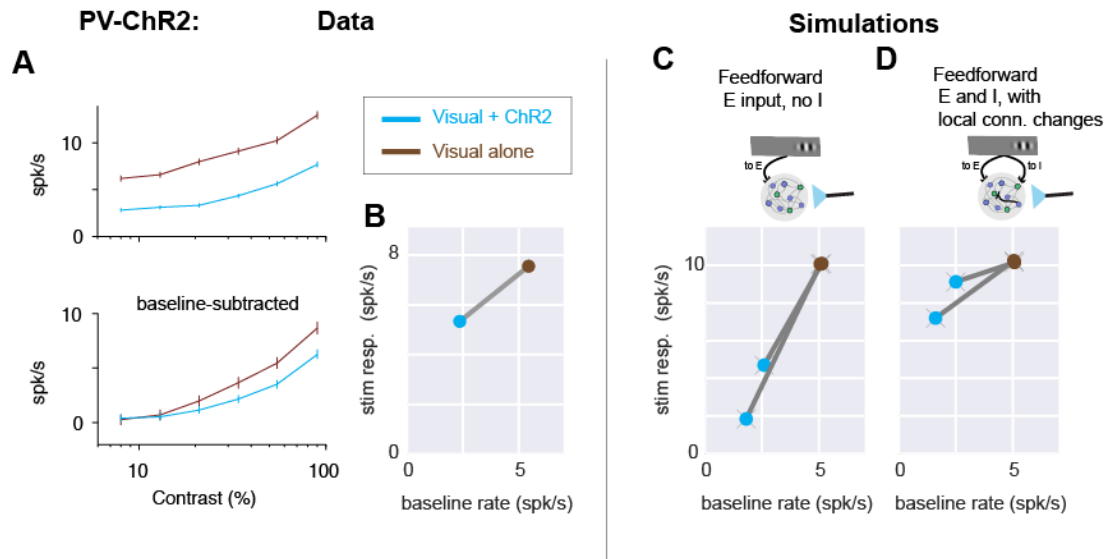

847  
 848 **Figure 7: PV-ChR2 stimulation data support the recurrent model with feedforward**  
 849 **inhibition.** **A**, Moderately sublinear scaling of visual responses is seen when PV neurons  
 850 are optogenetically stimulated. (Data set previously reported in Glickfeld et al., 2013).  
 851 Same conventions as in Fig. 1D. N=43 units, 6 SU, 37 MU. **B**, response sizes plotted as a  
 852 function of baseline rate; same conventions as bottom panels in Fig. 6B-D. Stimulation of  
 853 PV inhibitory neurons lowers baseline firing rates (here 2.3X reduction), so visual + ChR2  
 854 response (blue point) is to the left of visual only (brown). **C-D**, Model (with feedforward  
 855 inhibition) that best fits E neuron stimulation data also describes moderate sublinearity seen  
 856 in PV-ChR2 stimulation. **C**, model with feedforward input to E cells only (same model as  
 857 in Fig. 6B) shows very strong sublinearity. Two lines show two different strengths of  
 858 optogenetic input to I cells (chosen to produce 2X or 3X decrease in baseline rates). **D**,  
 859 model with feedforward input to E and I cells and stronger local E to I connectivity (same  
 860 model as in Fig. 6D), shows a range of sublinear scaling similar to that seen in the  
 861 experimental data (A-B).
